# Supplementary material for: Alkaline metal and alkaline earth metal salts of di(1H-tetrazol-5-yl)methanone (DTO): energetic catalysts for ammonium perchlorate decomposition
Source: Royal Society of Chemistry journal article supplement (doi:10.1039/d1nj04594f), 2022-01-01

Supporting Information

**Alkaline Metal and Alkaline Earth Metal Salts of Di(1H-tetrazol-5-yl)Methanone (DTO): Energetic Catalysts for Ammonium Perchlorate Decomposition**

Hai-bo LI<sup>a</sup>, Yan-na WANG<sup>a,b</sup>, Zhenghe Wei<sup>c</sup>, Liang-hong XIA<sup>a</sup>, Zhi-min LI<sup>a\*</sup>, Tong-lai ZHANG<sup>a\*</sup>

<sup>a</sup> *State Key Laboratory of Explosion Science and Technology, Beijing Institute of Technology, Beijing 100081, China*

<sup>b</sup> *College of Chemistry and Chemical Engineering, Xingtai University, Xing tai 054001, China*

<sup>c</sup> *Department of Technology, Guangxi JinJianhua Civil Explosives Co. Ltd, Baise 533001, China*

\* Corresponding authors: E-mail: lizm@bit.edu.cn (Z. Li), ztlbit@bit.edu.cn (T. Zhang); Fax & Tel: +86 10 68911202

## **Contents**

**Table S1-Table S2** Crystal data for compound **1 - 7**.

**Table S3.** The first exothermic decomposition peak temperatures tested at different heating rates of the seven compounds.

**Figure S1-Figure S7** DSC curve of the seven compounds.

**Figure S8-Figure S12** TG-DTG curve of the seven compounds.

**Figure S13** DSC curves of mixed **1+AP, 2+AP, 3+AP** and **6+AP**.

**Table S1** X-ray crystallographic data for compounds 1, 2, 3, 4

|                                               | <b>1</b>                                                                    | <b>2</b>                                                                       | <b>3</b>                                                                   | <b>4</b>                                                          |
|-----------------------------------------------|-----------------------------------------------------------------------------|--------------------------------------------------------------------------------|----------------------------------------------------------------------------|-------------------------------------------------------------------|
| Formula                                       | C <sub>3</sub> H <sub>6</sub> N <sub>8</sub> Na <sub>2</sub> O <sub>4</sub> | C <sub>6</sub> H <sub>20</sub> N <sub>16</sub> Na <sub>4</sub> O <sub>12</sub> | C <sub>3</sub> H <sub>2</sub> K <sub>2</sub> N <sub>8</sub> O <sub>2</sub> | C <sub>3</sub> K <sub>0.5</sub> N <sub>8</sub> ORb <sub>1.5</sub> |
| M (g mol <sup>-1</sup> )                      | 264.14                                                                      | 600.34                                                                         | 260.33                                                                     | 311.86                                                            |
| Cryst. Syst.                                  | triclinic                                                                   | orthorhombic                                                                   | monoclinic                                                                 | triclinic                                                         |
| Space group                                   | <i>P</i> -1                                                                 | <i>Pnma</i>                                                                    | <i>P2</i> <sub>1</sub>                                                     | <i>P</i> -1                                                       |
| a (Å)                                         | 6.5949(13)                                                                  | 6.8000(14)                                                                     | 7.1376(14)                                                                 | 4.4887(9)                                                         |
| b (Å)                                         | 8.7129(17)                                                                  | 7.5000(15)                                                                     | 17.029(3)                                                                  | 7.5710(15)                                                        |
| c (Å)                                         | 9.1609(18)                                                                  | 24.200(5)                                                                      | 7.6232(15)                                                                 | 12.714(3)                                                         |
| α (°)                                         | 102.33(3)                                                                   | 90                                                                             | 90                                                                         | 97.31(3)                                                          |
| β (°)                                         | 90.26(3)                                                                    | 90.                                                                            | 111.38(3)                                                                  | 92.74(3)                                                          |
| γ (°)                                         | 105.15(3)                                                                   | 90                                                                             | 90                                                                         | 106.32(3)                                                         |
| V (Å <sup>3</sup> )                           | 495.34(19)                                                                  | 1234.2(4)                                                                      | 862.8(3)                                                                   | 409.70(16)                                                        |
| Z                                             | 2                                                                           | 2                                                                              | 4                                                                          | 2                                                                 |
| ρ (g cm <sup>-3</sup> )                       | 1.771                                                                       | 1.615                                                                          | 2.004                                                                      | 2.528                                                             |
| T (K)                                         | 153.15                                                                      | 153.15                                                                         | 153.15                                                                     | 153.15                                                            |
| F (000)                                       | 268.0                                                                       | 616.0                                                                          | 520.0                                                                      | 294.0                                                             |
| μ (mm <sup>-1</sup> )                         | 0.225                                                                       | 0.202                                                                          | 1.093                                                                      | 9.226                                                             |
| Reflns. collected                             | 3918                                                                        | 2553                                                                           | 5224                                                                       | 3076                                                              |
| Indep. Reflns.                                | 2206                                                                        | 1138                                                                           | 2768                                                                       | 1429                                                              |
| Params.                                       | 154                                                                         | 109                                                                            | 271                                                                        | 129                                                               |
| R <sub>int</sub> .                            | 0.0348                                                                      | 0.0285                                                                         | 0.0270                                                                     | 0.0329                                                            |
| S                                             | 1.105                                                                       | 1.264                                                                          | 1.053                                                                      | 1.099                                                             |
| R1 (I>2σ(I)) <sup>a</sup>                     | 0.0407                                                                      | 0.0940                                                                         | 0.0255                                                                     | 0.0329                                                            |
| R1 (all data)                                 | 0.0437                                                                      | 0.0844                                                                         | 0.0260                                                                     | 0.0359                                                            |
| wR2 (I>2σ(I)) <sup>a</sup>                    | 0.1046                                                                      | 0.1869                                                                         | 0.0620                                                                     | 0.0726                                                            |
| wR2 (all data)                                | 0.1110                                                                      | 0.1878                                                                         | 0.0623                                                                     | 0.0742                                                            |
| Largest diff. peak /hole (e Å <sup>-3</sup> ) | 0.33/-0.35                                                                  | 0.39/-0.66                                                                     | 0.22/-0.28                                                                 | 0.56/-0.57                                                        |
| CCDC                                          | 2078900                                                                     | 2078909                                                                        | 2078919                                                                    | 2078913                                                           |

<sup>a</sup>R1 =  $\Sigma||F_o| - |F_c||/\Sigma|F_o|$ . wR2 =  $[\Sigma w(F_o^2 - F_c^2)^2/\Sigma w(F_o^2)^2]^{1/2}$ ; w =  $1/[\sigma^2(F_o^2) + (xP)^2 + yP]$ .

**Table S2** X-ray crystallographic data for compounds 5, 6, 7

|                                                  | <b>5</b>                                                       | <b>6</b>                                                       | <b>7</b>                                                        |
|--------------------------------------------------|----------------------------------------------------------------|----------------------------------------------------------------|-----------------------------------------------------------------|
| Formula                                          | C <sub>3</sub> H <sub>10</sub> MgN <sub>8</sub> O <sub>6</sub> | C <sub>3</sub> H <sub>10</sub> CaN <sub>8</sub> O <sub>6</sub> | C <sub>3</sub> H <sub>10</sub> N <sub>8</sub> O <sub>6</sub> Sr |
| M (g mol <sup>-1</sup> )                         | 278.50                                                         | 294.27                                                         | 341.81                                                          |
| Cryst. Syst.                                     | orthorhombic                                                   | orthorhombic                                                   | orthorhombic                                                    |
| Space group                                      | <i>Pbcn</i>                                                    | <i>P2<sub>1</sub>2<sub>1</sub>2<sub>1</sub></i>                | <i>P2<sub>1</sub>2<sub>1</sub>2<sub>1</sub></i>                 |
| a (Å)                                            | 11.890(2)                                                      | 6.5466(13)                                                     | 6.6230(13)                                                      |
| b (Å)                                            | 16.700(3)                                                      | 12.561(3)                                                      | 12.839(3)                                                       |
| c (Å)                                            | 11.228(2)                                                      | 13.047(3)                                                      | 13.282(3)                                                       |
| α (°)                                            | 90                                                             | 90                                                             | 90                                                              |
| β (°)                                            | 90                                                             | 90                                                             | 90                                                              |
| γ (°)                                            | 90                                                             | 90                                                             | 90                                                              |
| V (Å <sup>3</sup> )                              | 2229.4(8)                                                      | 1072.9(4)                                                      | 1129.3(4)                                                       |
| Z                                                | 8                                                              | 4                                                              | 4                                                               |
| ρ (g cm <sup>-3</sup> )                          | 1.659                                                          | 1.822                                                          | 2.010                                                           |
| T (K)                                            | 153.15                                                         | 153.15                                                         | 153.15                                                          |
| F (000)                                          | 1152.0                                                         | 332.0                                                          | 680.0                                                           |
| μ (mm <sup>-1</sup> )                            | 0.200                                                          | 0.627                                                          | 4.814                                                           |
| Reflns. collected                                | 5924                                                           | 4309                                                           | 4560                                                            |
| Indep. Reflns.                                   | 2515                                                           | 2250                                                           | 2529                                                            |
| Params.                                          | 164                                                            | 163                                                            | 163                                                             |
| R <sub>int.</sub>                                | 0.0439                                                         | 0.0289                                                         | 0.0364                                                          |
| S                                                | 1.116                                                          | 1.049                                                          | 1.073                                                           |
| R1 (I>2σ(I)) <sup>a</sup>                        | 0.0589                                                         | 0.0354                                                         | 0.0312                                                          |
| R1 (all data)                                    | 0.0687                                                         | 0.0362                                                         | 0.0320                                                          |
| wR2 (I>2σ(I)) <sup>a</sup>                       | 0.1288                                                         | 0.0823                                                         | 0.0726                                                          |
| wR2 (all data)                                   | 0.1363                                                         | 0.0831                                                         | 0.0732                                                          |
| Largest diff. peak<br>/hole (e Å <sup>-3</sup> ) | 0.36/-0.35                                                     | 0.26/-0.26                                                     | 0.34/-0.96                                                      |
| CCDC                                             | 2078915                                                        | 2078916                                                        | 2078917                                                         |

<sup>a</sup>R1 =  $\Sigma||F_o| - |F_c||/\Sigma|F_o|$ . wR2 =  $[\Sigma w(F_o^2 - F_c^2)^2/\Sigma w(F_o^2)^2]^{1/2}$ ; w =  $1/[\sigma^2(F_o^2) + (xP)^2 + yP]$ .

**Table S3.** The first exothermic decomposition peak temperatures tested at different heating rates of compounds **1** to **7**.

| compound | The first exothermic decomposition peak temperatures (°C ) |                        |                        |                        |
|----------|------------------------------------------------------------|------------------------|------------------------|------------------------|
|          | 5°C·min <sup>-1</sup>                                      | 10°C·min <sup>-1</sup> | 15°C·min <sup>-1</sup> | 20°C·min <sup>-1</sup> |
| <b>1</b> | 252.3                                                      | 254.2                  | 256.1                  | 257.5                  |
| <b>2</b> | 258.8                                                      | 260.2                  | 261.4                  | 262.8                  |
| <b>3</b> | 223.5                                                      | 225.2                  | 227.3                  | 229.0                  |
| <b>4</b> | 242.3                                                      | 244.1                  | 246.2                  | 248.0                  |
| <b>5</b> | 220.1                                                      | 221.9                  | 223.5                  | 225.0                  |
| <b>6</b> | 200.6                                                      | 202.3                  | 203.8                  | 205.2                  |
| <b>7</b> | 201.7                                                      | 203.8                  | 208.4                  | 210.6                  |

**Figure S1.** DSC curve of **1**.

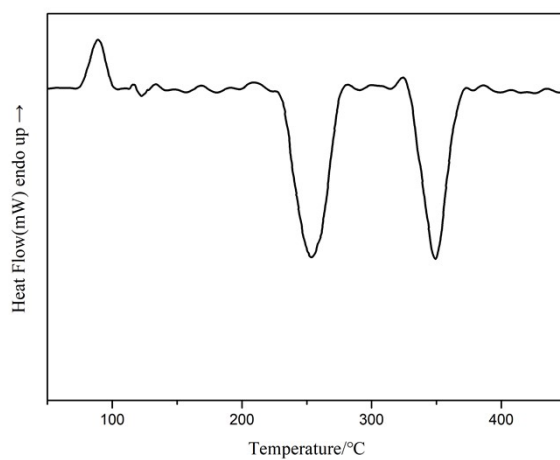

**Figure S2.** DSC curve of **2**.

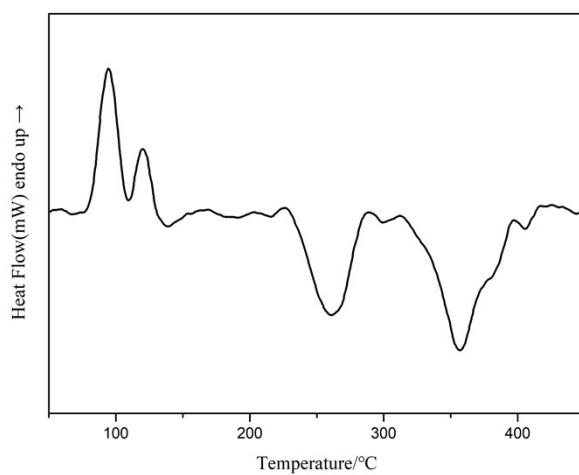

**Figure S3.** DSC curve of **3**.

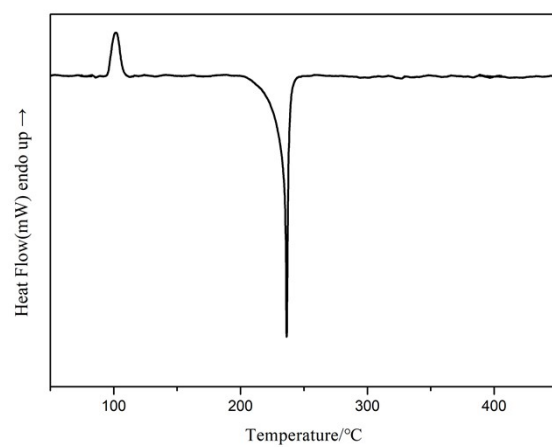

**Figure S4.** DSC curve of **4**.

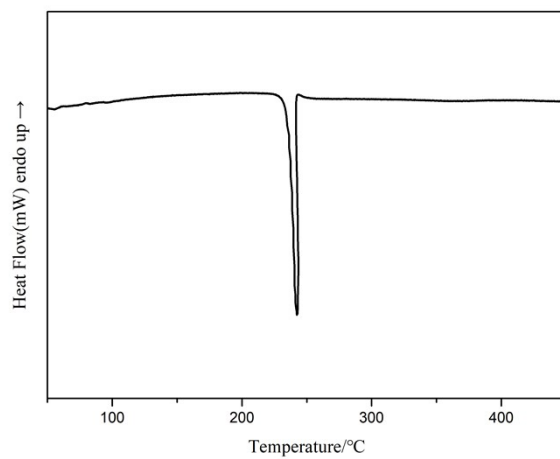

**Figure S5.** DSC curve of **5**.

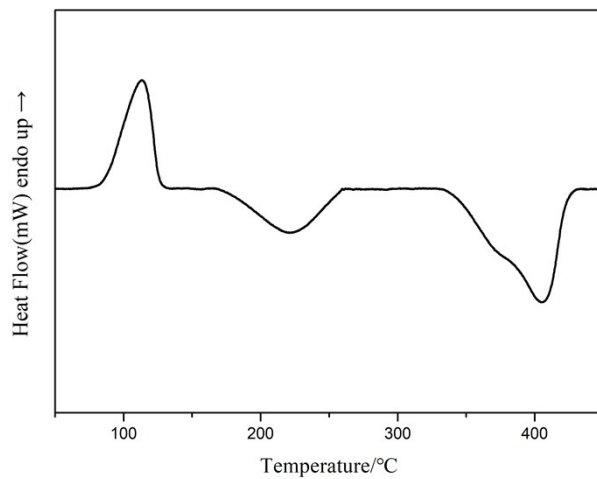

**Figure S6.** DSC curve of **6**.

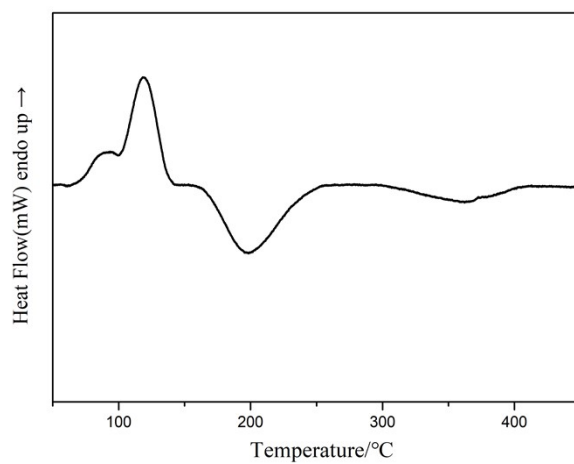

**Figure S7.** DSC curve of **7**.

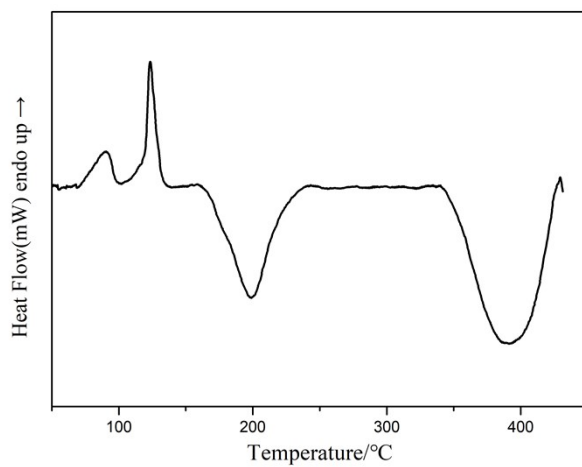

**Figure S8.** TG-DTG curve of **1**.

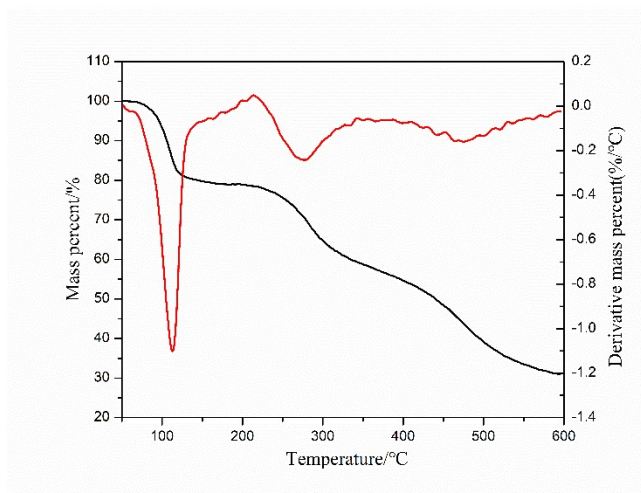

**Figure S9.** TG-DTG curve of **2**.

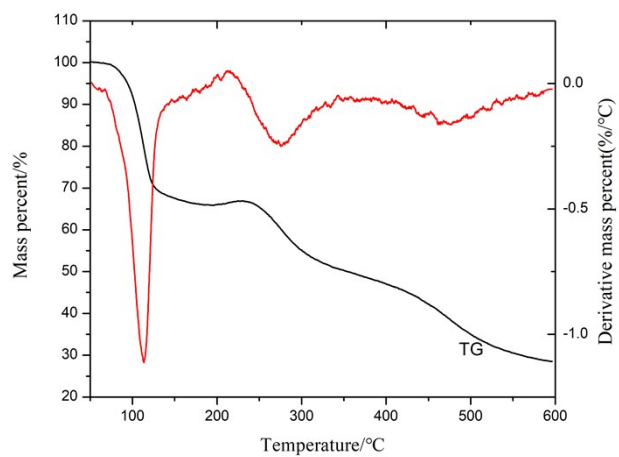



**Figure S10.** TG-DTG curve of **5**.

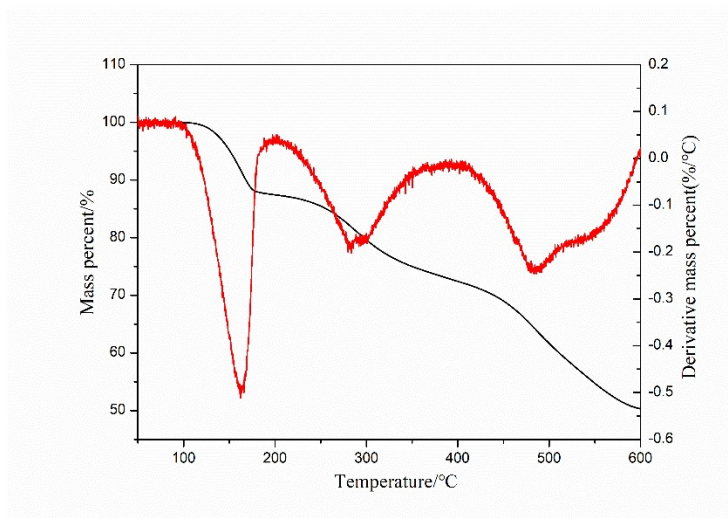

**Figure S11.** TG-DTG curve of **6**.

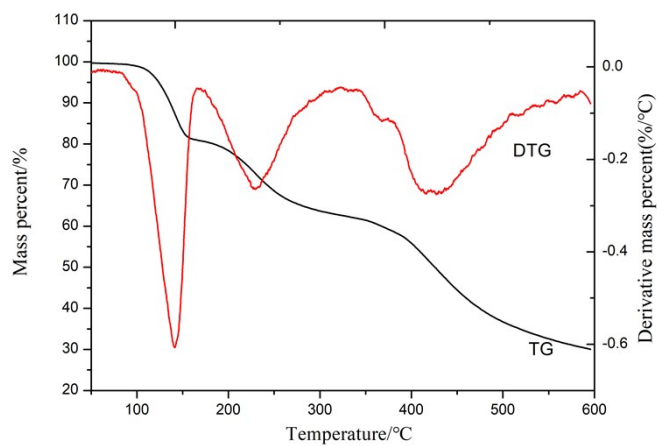

**Figure S12.** TG-DTG curve of **7**.

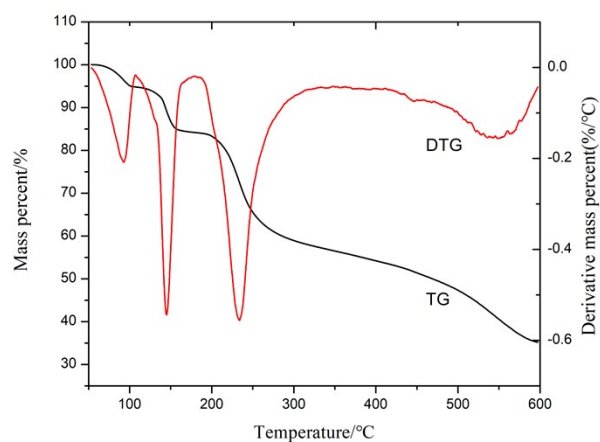

**Figure S13.** DSC curves of mixed **1+AP**, **3+AP**, **4+AP** and **7+AP**.

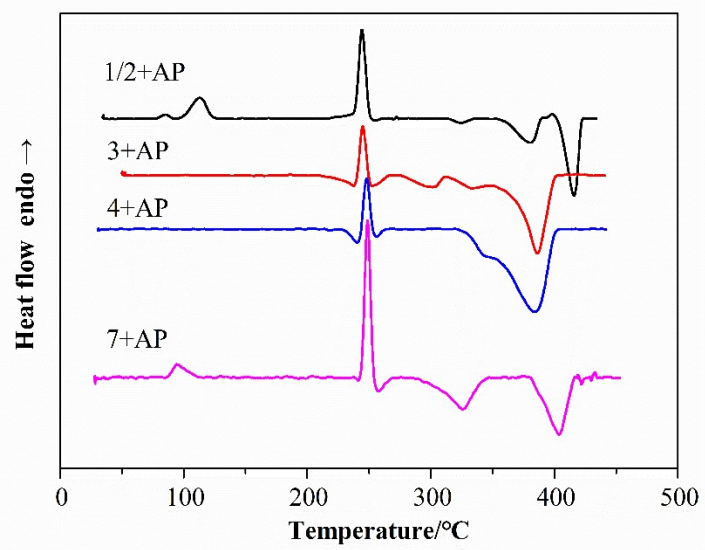

Supplement: d1nj04594f1.pdf [file d1nj04594f1.pdf]
